# Supplementary material for: Incorporation of trivalent cations in NaX zeolite nanocrystals for the adsorption of O2 in the presence of CO2
Source: Royal Society of Chemistry journal article supplement (doi:10.1039/d0cp00111b), 2020-01-01
Supplement: d0cp00111b1.pdf [file d0cp00111b1.pdf]

## Supplementary information

Incorporation of trivalent cations in NaX zeolite nanocrystals for the adsorption of  
 $O_2$  in the presence of  $CO_2$

Sarah Komaty,<sup>a</sup> Ayoub Daouli,<sup>b</sup> Michael Badawi,<sup>b</sup> Clément Anfray,<sup>c</sup> Moussa Zaarour,<sup>a</sup> Samuel Valable,<sup>c</sup> Svetlana Mintova<sup>\*a</sup>

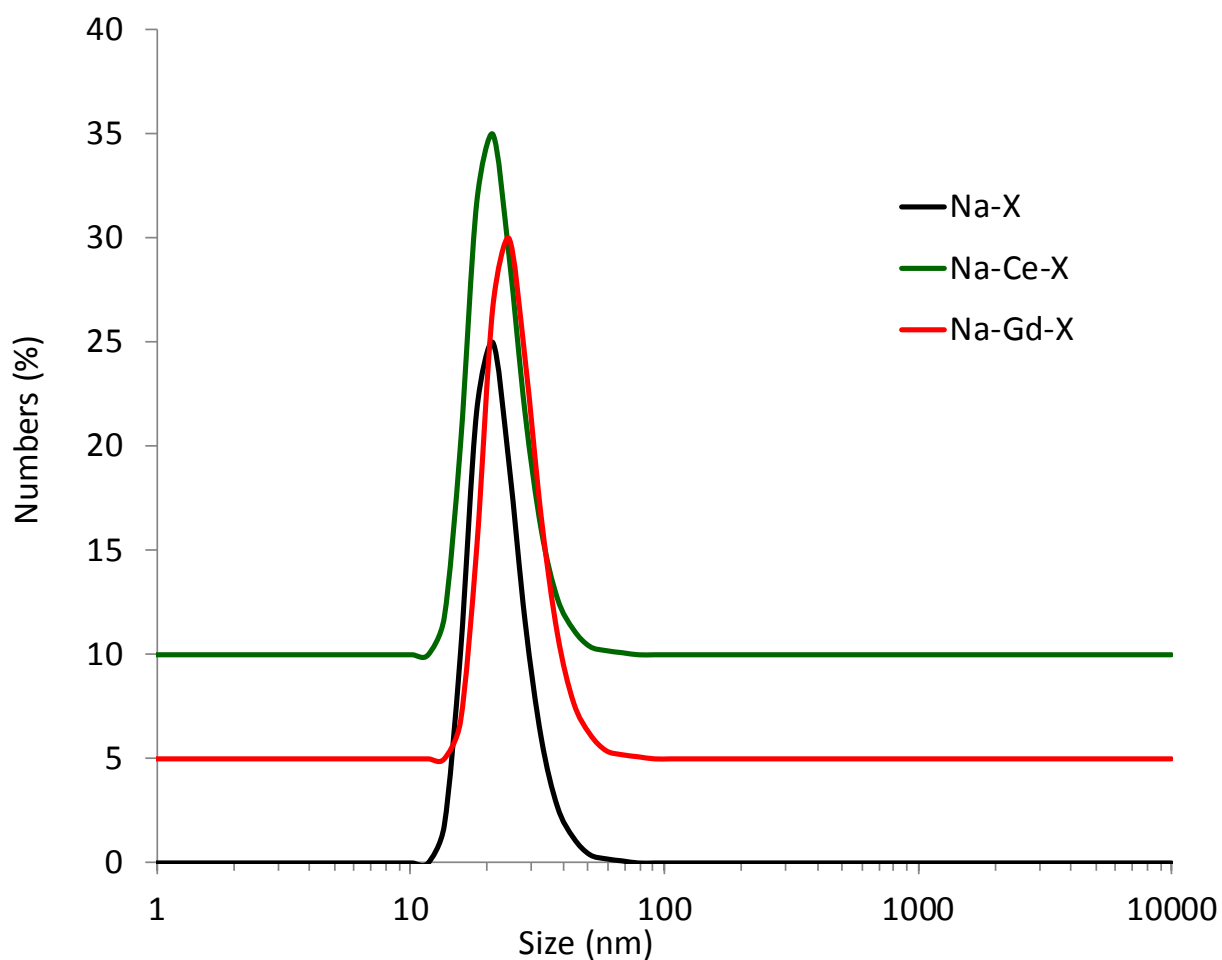

**Figure S1.** Particle size distribution of as-synthesized Na-X, cerium and gadolinium ion exchanged zeolites (Na-Ce-X and Na-Gd-X) measured by Dynamic Light Scattering (DLS).

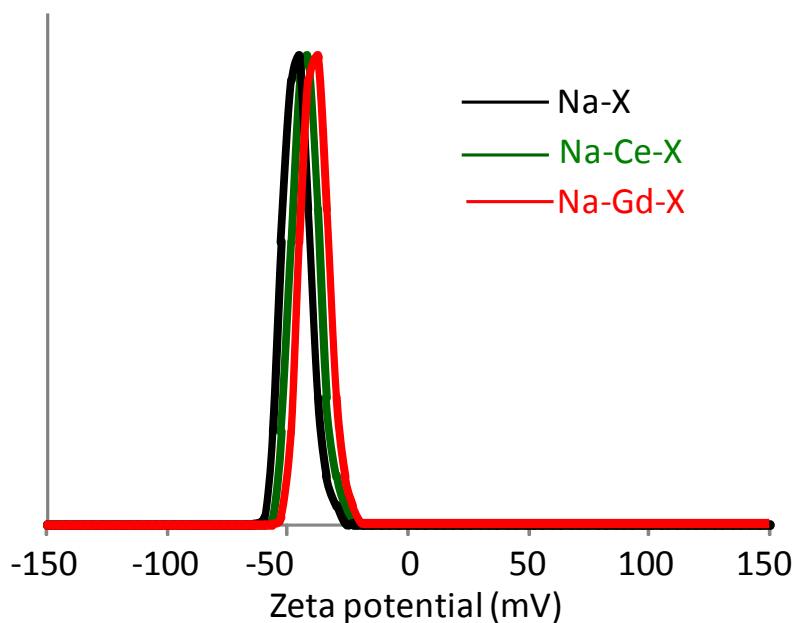

**Figure S2.** Zeta potential curves of as-synthesized Na-X, cerium and gadolinium ion exchanged zeolites (Na-Ce-X and Na-Gd-X).

**Table S1.** External surface area, diameter of micropores and mesopores of the as-synthesized Na-X, and the ion-exchanged Na-Ce-X, and Na-Gd-X zeolite samples.

| Sample         | $S_{\text{ext}}$<br>( $\text{m}^2\cdot\text{g}^{-1}$ ) | $d_{\text{mic}}^{\text{a}}$<br>(nm) | $d_{\text{meso}}^{\text{b}}$<br>(nm) |
|----------------|--------------------------------------------------------|-------------------------------------|--------------------------------------|
| <b>Na-X</b>    | 225                                                    | 0.70                                | 14.3                                 |
| <b>Na-Ce-X</b> | 217                                                    | 0.74                                | 16.1                                 |
| <b>Na-Gd-X</b> | 214                                                    | 0.74                                | 15.1                                 |

<sup>a</sup>Diameter of micropore determined by means of NLDFT method. <sup>b</sup>Diameter of mesopore determined by means of BJH method
